# Supplementary material for: Relative Validity and Reproducibility of a Food Frequency Questionnaire for Assessing Dietary Intakes in a Multi-Ethnic Asian Population Using 24-h Dietary Recalls and Biomarkers
Source: MDPI journal article supplement (doi:10.3390/nu9101059), 2017-09-25
Supplement: s1 [file s1]

**Table S1.** Pearson correlations between FFQ2 total fruit and vegetables and individual serum carotenoid concentrations, n = 144<sup>1</sup>

| Carotenoid (mg/L plasma) | All <sup>2</sup><br>n = 144 | Chinese <sup>3</sup><br>n = 53 | Malay <sup>3</sup><br>n = 39 | Indian <sup>3</sup><br>n = 52 |
|--------------------------|-----------------------------|--------------------------------|------------------------------|-------------------------------|
| Alpha-carotene           | 0.24*                       | 0.52*                          | 0.14                         | -0.07                         |
| Beta-carotene            | 0.19*                       | 0.47*                          | 0.17                         | -0.20                         |
| Alpha-cryptoxanthin      | 0.12                        | 0.39*                          | 0.18                         | -0.31                         |
| Beta-cryptoxanthin       | 0.25*                       | 0.44*                          | 0.25                         | -0.12                         |
| Lycopene                 | 0.21*                       | 0.32*                          | 0.41*                        | 0.01                          |
| Lutein                   | 0.23*                       | 0.30*                          | 0.23                         | 0.10                          |
| Zeaxanthin               | 0.05                        | 0.15                           | 0.24                         | -0.17                         |

Values were transformed using natural logs or square roots before analysis

<sup>1</sup> Carotenoid supplement users were excluded

<sup>2</sup> Adjusted for intra-individual variation, ethnicity, age, sex, fat intake (% energy), and energy intake

<sup>3</sup> Adjusted for intra-individual variation, age, sex, fat intake (% energy), and energy intake

\* Correlation is statistically significant,  $P < 0.05$

**Table S2.** Pearson correlations between FFQ2 and biomarkers, by sex

| Biomarker and FFQ measurement                     | Male<br>n = 81 | Female<br>n = 80 |
|---------------------------------------------------|----------------|------------------|
| Isoflavones (ug/gUCr)                             |                |                  |
| Soy protein (g/day) <sup>1</sup>                  | 0.57*          | 0.32*            |
| Total carotenoids (mg/L plasma)                   |                |                  |
| Fruit (inc 100% fruit juice) (g/day) <sup>2</sup> | 0.16           | 0.41*            |
| Vegetables (g/day) <sup>2</sup>                   | 0.20           | 0.24*            |
| Total fruit and vegetables (g/day) <sup>2</sup>   | 0.22           | 0.41*            |
| Plasma EPA + DHA (% total FA)                     |                |                  |
| Fish and seafood (g/day)                          | 0.36*          | 0.36*            |
| Plasma polyunsaturated FA (% total FA)            |                |                  |
| Polyunsaturated fat (%E)                          | 0.08           | 0.18             |
| Plasma odd chain saturated FA (% total FA)        |                |                  |
| Dairy fat (g/day)                                 | 0.51*          | 0.10             |

EPA, eicosapentaenoic acid; DHA, docosahexaenoic acid; %E, as a percentage of energy intake; FA, fatty acid

Values were transformed using natural logs or square roots before analysis

Values were adjusted for intra-individual variation, age, sex, total fat intake (as a % of energy), and energy intake

<sup>1</sup> Phytoestrogen supplement users were excluded (n = 17).

<sup>2</sup> Carotenoid supplement users were excluded (n = 17).

\* Correlation is statistically significant,  $P < 0.05$
